# Supplementary material for: Boosting cytotoxicity of adoptive allogeneic NK cell therapy with an oncolytic adenovirus encoding a human vIL-2 cytokine for the treatment of human ovarian cancer
Source: PubMed Central journal article supplement (PMC10721546; doi:10.1038/s41417-023-00674-3), 2023-11-10
Supplement: 41417_2023_674_MOESM1_ESM.pdf [file 41417_2023_674_MOESM1_ESM.pdf]

## Boosting cytotoxicity of adoptive allogeneic NK cell therapy with an oncolytic adenovirus

### encoding a human vIL-2 cytokine for the treatment of human ovarian cancer

Quixabeira DCA<sup>1,2</sup>, Pakola S<sup>1</sup>, Jirovec E<sup>1</sup>, Havunen R<sup>1,2</sup>, Basnet S<sup>1</sup>, Santos JM<sup>1,2</sup>, Kudling TV<sup>1</sup>, Clubb JHA<sup>1,2</sup>, Haybout L<sup>1</sup>, Arias V<sup>1</sup>, Grönberg-Vähä-Koskela S<sup>1,3</sup>, Cervera-Carrascon V<sup>1,2</sup>, Kerkelä E<sup>4</sup>, Pasanen A<sup>5</sup>, Anttila M<sup>6</sup>, Tapper J<sup>7</sup>, Kanerva A<sup>7</sup>, and Hemminki A<sup>1,2,3,\*</sup>

### Supplements

| Supplementary Table 1- Flow cytometry panel |                   |           |                  |              |
|---------------------------------------------|-------------------|-----------|------------------|--------------|
| Antigen                                     | Fluochrome        | Clone     | Catalogue Number | Provider     |
| EpCAM                                       | FITC              | 9C4       | 324204           | Biolegend    |
| MICA/MICB                                   | APC               | 6D4       | 320908           | Biolegend    |
| HLA-ABC                                     | PE-Cyanine 7      | W6/32     | 25-9983-42       | ThermoFisher |
| HLA-E                                       | PE                | 3D12HLA-E | 12-9953-42       | ThermoFisher |
| CD155 (PVR)                                 | Alexa Fluor®      | SKII.4    | 337630           | Biolegend    |
| CD112 (Netin)                               | PerCP-Cyanine 5.5 | TX31      | 337416           | Biolegend    |
| Propidium Iodide Solution                   | PI                | RUO       | 421301           | Biolegend    |
| CD3                                         | AF700             | SK7       | 344822           | Biolegend    |
| CD4                                         | BV570             | RPA-T4    | 300534           | Biolegend    |
| CD8                                         | BV510             | RPA-T8    | 563256           | BD           |
| PD-1                                        | APC-Cy7           | EH12.2H7  | 329922           | Biolegend    |
| CD25                                        | BV711             | M-A251    | 356138           | Biolegend    |
| FoxP3                                       | PE-Dazzle         | 206D      | 320126           | Biolegend    |
| GrzmB                                       | PE                | GB11      | 561142           | BD           |
| EpCam                                       | PE-Dazzle         | 9C4       | 324232           | Biolegend    |
| CD56                                        | BV510             | HCD56     | 318340           | Biolegend    |
| CD158b                                      | FITC              | DX27      | 312604           | Biolegend    |

**Supplementary Table 1.** List of Antibodies and fluorochromes used for the cell immune and MHC studies.

| Supplementary Table 2- IHC antibody panel |               |             |
|-------------------------------------------|---------------|-------------|
| Antibody                                  | Dilution used | Provider    |
| CD4 (104R-16)                             | 1:100         | Cell Marque |
| CD8 (NCL-CD8-4B11)                        | 1:50          | N-C         |
| CD56 (156R-96)                            | 1:500         | Cell Marque |
| PD-L1 (741-4860)                          | Ready to use  | Roche       |

**Supplementary Table 2.** List of antibodies used for the immunohistochemistry staining of OvCa slides.

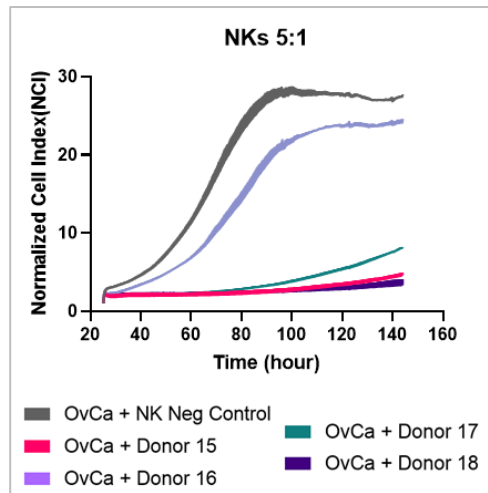

**Supplementary Figure 1.** NK cytotoxicity screening using healthy blood donors. Ovarian cancer patient-derived cell line was seeded and incubated for 24 hours, when freshly isolated and expanded allogeneic NK cells from four different donors were added in 5:1 ratio (E:T). Non-expanded and non-activated NK cells were used as a negative control group.

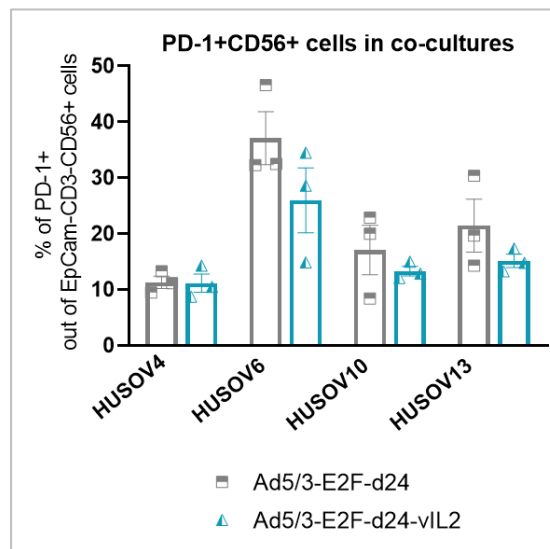

**Supplementary Figure 2.** Immune status of lymphocytes present in human ovarian cancer co-cultures treated with vIL-2 in combination with adoptive NK cell therapy. HUSOV4, HUSOV6, HUSOV10, and HUSOV13 patient samples were seeded in triplicates at the concentration of  $3.5 \times 10^5$  cells per well. After 24 hours incubation period at  $37^\circ\text{C}$ , ovarian cancer samples were treated with Ad5/3-E2F-d24-vIL2 virus or Ad5/3-E2F-d24 (100vp/cell). Co-cultures were incubated for 6 more days, then cells were harvested and lymphocytes stained with antibody fluoro-chrome-conjugated for flow cytometry analyses. Percentage of PD-1+CD56+ cells in OvCa co-cultures treated either with Ad5/3-E2F-d24 virus or Ad5/3-E2F-d24-vIL2 virus. Data sets were analysed for statistical significance by unpaired T test with Welch's correction and presented as mean  $\pm$  SEM.

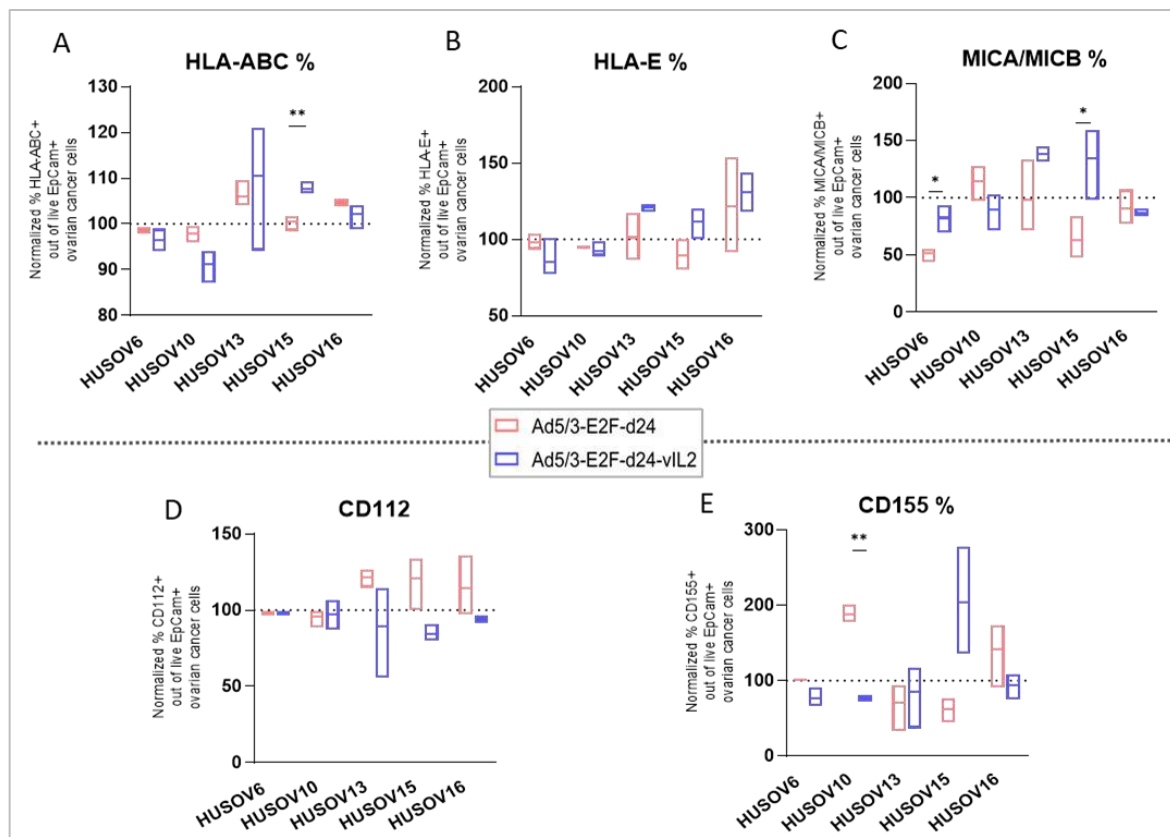

**Supplementary Figure 3.** Differences on the expression of (A) HLA-ABC, (B) HLA-E, (C) MICA/MICB, (D) CD112, and (E) CD155 percentage in ovarian cancer cells from patient samples (HUSOV6, HUSOV10, HUSOV13, HUSOV15, and HUSOV16) upon Ad5/3-E2F-d24-vIL2 virus infection. Results were normalized to their respective mock (uninfected) group. \*p<0.05, \*\*p<0.01.

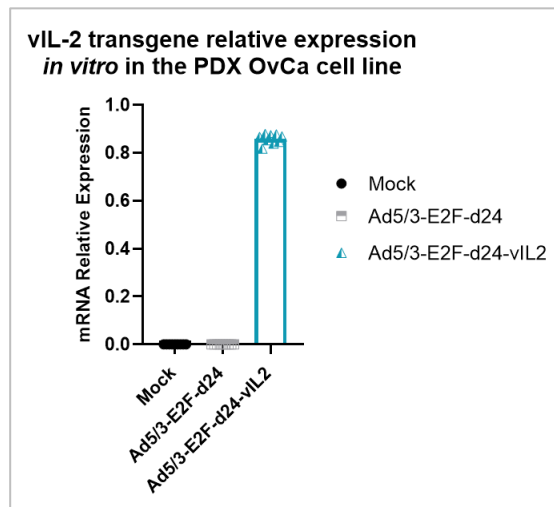

**Supplementary Figure 4.** *In vitro* relative mRNA expression of vIL-2 cytokine transgene in the OvCa PDX cell line used for the *in vivo* animal experiment. OvCa PDX cells were plated in triplicates and after 24 hours of incubation were infected either with Ad5/3-E2F-d24 virus or Ad5/3-E2F-d24-vIL2. Mock control group was left uninfected. OvCa PDX cells were harvested after 3 days of virus infection and RT-qPCR performed in triplicates as described before(18). Primers, probes, and qPCR cycling conditions have been described previously(18).

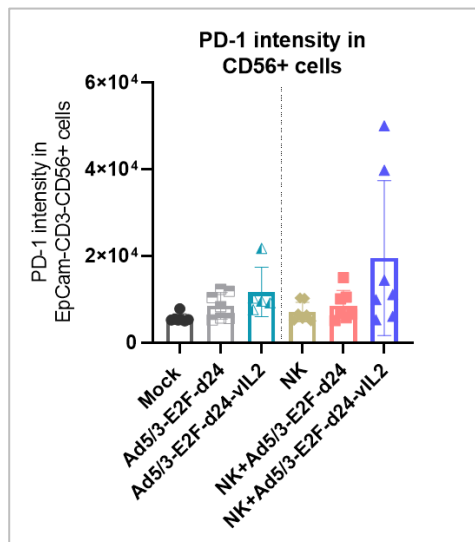

**Supplementary Figure 5.** Immune studies of tumor-infiltrating lymphocytes in treated ovarian cancer PDX tumors. On day 12, the experiment was finished and tumors were processed into single-cell suspension and later analysed by flow cytometry. Levels of PD-1 MFI in NK+ cells in tumors treated with virus backbone and vIL-2 virus monotherapy treatments, and the respective viruses in combination with NK cell therapy strategy. Data sets were analysed for statistical significance by unpaired T test with Welch's correction and presented as mean +/- SEM.
